# Supplementary material for: Effect of channel thickness on radiation hardness of solution-processed oxide thin film transistors
Source: Royal Society of Chemistry journal article supplement (doi:10.1039/d3tc02267f), 2023-01-01
Supplement: d3tc02267f1.pdf [file d3tc02267f1.pdf]

Electronic Supplementary Information

**Effect of Channel Thickness on Radiation Hardness of Solution-Processed  
Oxide Thin Film Transistors**

*Hyunwoo Kang,<sup>1</sup> Dongil Ho,<sup>1</sup> Youngseok Kim,<sup>1</sup> Jaeseung Kim,<sup>2</sup> Hyunjung Kim,<sup>2</sup> and Choongik Kim<sup>1,\*</sup>*

<sup>1</sup> Department of Chemical and Biomolecular Engineering, Sogang University, 1 Shinsoo-dong, Mapo-gu, Seoul 04107, Republic of Korea

<sup>2</sup> Department of Physics, Sogang University, Seoul 04107, Republic of Korea

E-mail: choongik@sogang.ac.kr

Keywords: Metal oxide semiconductors; thin film transistors; channel thickness; radiation-hard; proton irradiation

**Table S1.** A summary of measured optical bandgap ( $E_{\text{gap}}$ ), the energy from the valence band maximum to the fermi level ( $\Delta E_{\text{VB}}$ ), and the conduction band offsets ( $\Delta E_{\text{CB}}$ ) for ZITO thin films with different  $t_{\text{chS}}$  from UV-vis spectroscopy and XPS

|                                  | $E_{\text{gap}}$ (eV) | $\Delta E_{\text{VB}}$ (eV) | $\Delta E_{\text{CB}}$ (eV) |
|----------------------------------|-----------------------|-----------------------------|-----------------------------|
| $t_{\text{ch}} = 4 \text{ nm}$   | 3.81                  | 2.61                        | 1.20                        |
| $t_{\text{ch}} = 5 \text{ nm}$   | 3.47                  | 2.76                        | 0.71                        |
| $t_{\text{ch}} = 6.2 \text{ nm}$ | 3.38                  | 2.91                        | 0.44                        |

**Table S2.** Representative charge-carrier mobility ( $\mu$ , cm<sup>2</sup>/Vs), current on/off ratio ( $I_{on}/I_{off}$ ), threshold voltage ( $V_{th}$ , V), turn-on voltage ( $V_{on}$ , V), and subthreshold swing ( $SS$ , V/dec) ZITO TFT with  $t_{ch}$  value of 4 nm on SiO<sub>2</sub> 100 nm devices during in-situ proton irradiation with a dose of 10<sup>13</sup> cm<sup>-2</sup>.<sup>a</sup> The average values are obtained from 5 samples.

| ZITO / SiO <sub>2</sub><br>100nm | $\mu$      | $I_{on}/I_{off}$            | $V_{th}$    | $V_{on}$    | $SS$      |
|----------------------------------|------------|-----------------------------|-------------|-------------|-----------|
| 1 <sup>st</sup> cycle            | 10.3 ± 1.1 | $(1.3 \pm 0.5) \times 10^7$ | 0.2 ± 0.4   | 0 ± 0.3     | 1.1 ± 0.3 |
| 2 <sup>nd</sup> cycle            | 11.7 ± 2.5 | $(3.6 \pm 1.7) \times 10^7$ | -0.6 ± 1.2  | -4 ± 0.9    | 2.6 ± 0.5 |
| 3 <sup>rd</sup> cycle            | 13.2 ± 2.9 | $(1.4 \pm 0.7) \times 10^4$ | -4.8 ± 1.4  | -           | 3.1 ± 1.0 |
| 4 <sup>th</sup> cycle            | 13.9 ± 3.3 | $(1.1 \pm 0.6) \times 10^4$ | -7.9 ± 1.6  | -           | 3.8 ± 1.2 |
| 5 <sup>th</sup> cycle            | 14.3 ± 3.9 | $(1.1 \pm 0.5) \times 10^4$ | -10.5 ± 2.0 | -           | 4.0 ± 1.6 |
| 6 <sup>th</sup> cycle            | 13.2 ± 3.1 | $(2.8 \pm 1.6) \times 10^6$ | -8.2 ± 1.5  | -10.5 ± 1.2 | 2.9 ± 0.9 |
| 7 <sup>th</sup> cycle            | 13.2 ± 1.5 | $(5.6 \pm 3.1) \times 10^6$ | -7.6 ± 1.4  | -10.2 ± 1.2 | 2.6 ± 1.0 |
| 8 <sup>th</sup> cycle            | 13.1 ± 1.4 | $(4.7 \pm 2.0) \times 10^6$ | -7.3 ± 1.3  | -9.9 ± 1.2  | 2.4 ± 0.7 |
| 9 <sup>th</sup> cycle            | 13.1 ± 1.5 | $(3.5 \pm 1.0) \times 10^6$ | -7.2 ± 1.3  | -9.9 ± 1.2  | 2.4 ± 0.8 |
| 10 <sup>th</sup> cycle           | 13.1 ± 1.4 | $(3.2 \pm 1.4) \times 10^6$ | -7.1 ± 1.4  | -9.9 ± 1.2  | 2.3 ± 0.5 |
| 11 <sup>th</sup> cycle           | 13.1 ± 1.3 | $(3.4 \pm 1.9) \times 10^6$ | -7.0 ± 1.3  | -9.6 ± 1.5  | 2.2 ± 0.7 |
| 12 <sup>th</sup> cycle           | 13.0 ± 1.4 | $(3.1 \pm 2.1) \times 10^6$ | -6.8 ± 1.2  | -9.6 ± 1.5  | 2.1 ± 0.6 |
| 13 <sup>th</sup> cycle           | 13.0 ± 1.4 | $(3.6 \pm 1.8) \times 10^6$ | -6.7 ± 1.3  | -9.6 ± 1.2  | 2.0 ± 0.6 |
| 14 <sup>th</sup> cycle           | 13.0 ± 1.3 | $(3.7 \pm 2.0) \times 10^6$ | -6.7 ± 1.3  | -9.3 ± 1.5  | 2.0 ± 0.5 |

<sup>a</sup> Gray area indicates device characteristics during proton irradiation.

**Table S3.** Representative charge-carrier mobility ( $\mu$ , cm<sup>2</sup>/Vs), current on/off ratio ( $I_{on}/I_{off}$ ), threshold voltage ( $V_{th}$ , V), turn-on voltage ( $V_{on}$ , V), and subthreshold swing ( $SS$ , V/dec) for ZITO TFT with  $t_{ch}$  value of 5 nm on SiO<sub>2</sub> 100 nm devices during in-situ proton irradiation with a dose of 10<sup>13</sup> cm<sup>-2</sup>.<sup>a</sup> The average values are obtained from 5 samples.

| ZITO / SiO <sub>2</sub><br>100nm | $\mu$      | $I_{on}/I_{off}$                 | $V_{th}$     | $V_{on}$ | $SS$      |
|----------------------------------|------------|----------------------------------|--------------|----------|-----------|
| 1 <sup>st</sup> cycle            | 13.2 ± 1.5 | (7.0 ± 3.2) ×<br>10 <sup>6</sup> | -2.0 ± 0.8   | -3 ± 0.6 | 1.1 ± 0.4 |
| 2 <sup>nd</sup> cycle            | 18.5 ± 3.0 | (1.9 ± 1.0) ×<br>10 <sup>7</sup> | -4.5 ± 3.1   | -        | -         |
| 3 <sup>rd</sup> cycle            | 19.9 ± 3.3 | (2.1 ± 0.8) ×<br>10 <sup>2</sup> | -19.2 ± 5.9  | -        | -         |
| 4 <sup>th</sup> cycle            | 20.9 ± 3.5 | (1.8 ± 0.6) ×<br>10 <sup>1</sup> | -35.5 ± 8.6  | -        | -         |
| 5 <sup>th</sup> cycle            | 21.6 ± 3.6 | 6.8 ± 4.2                        | -45.8 ± 12.2 | -        | -         |
| 6 <sup>th</sup> cycle            | 16.4 ± 4.5 | 4.9 ± 3.7                        | -58.0 ± 15.4 | -        | -         |
| 7 <sup>th</sup> cycle            | 16.2 ± 1.8 | 5.1 ± 3.2                        | -62.1 ± 7.4  | -        | -         |
| 8 <sup>th</sup> cycle            | 16.5 ± 1.7 | 5.1 ± 3.3                        | -60.2 ± 8.7  | -        | -         |
| 9 <sup>th</sup> cycle            | 16.5 ± 1.7 | 5.3 ± 3.1                        | -59.4 ± 8.4  | -        | -         |
| 10 <sup>th</sup> cycle           | 16.2 ± 1.8 | 5.3 ± 3.2                        | -58.8 ± 8.1  | -        | -         |
| 11 <sup>th</sup> cycle           | 16.3 ± 1.9 | 5.4 ± 3.0                        | -58.2 ± 7.6  | -        | -         |
| 12 <sup>th</sup> cycle           | 16.1 ± 1.8 | 5.7 ± 2.9                        | -57.7 ± 7.2  | -        | -         |
| 13 <sup>th</sup> cycle           | 16.1 ± 1.7 | 5.8 ± 2.6                        | -57.6 ± 7.0  | -        | -         |
| 14 <sup>th</sup> cycle           | 16.0 ± 1.8 | 5.8 ± 2.5                        | -57.1 ± 7.4  | -        | -         |

<sup>a</sup> Gray area indicates device characteristics during proton irradiation.

**Table S4.** Representative charge-carrier mobility ( $\mu$ , cm<sup>2</sup>/Vs), current on/off ratio ( $I_{on}/I_{off}$ ), threshold voltage ( $V_{th}$ , V), turn-on voltage ( $V_{on}$ , V), and subthreshold swing ( $SS$ , V/dec) for ZITO TFT with  $t_{ch}$  value of 6.2 nm on SiO<sub>2</sub> 100 nm devices during in-situ proton irradiation with a dose of 10<sup>13</sup> cm<sup>-2</sup>.<sup>a</sup> The average values are obtained from 5 samples.

| ZITO / SiO <sub>2</sub><br>100nm | $\mu$      | $I_{on}/I_{off}$              | $V_{th}$     | $V_{on}$   | $SS$      |
|----------------------------------|------------|-------------------------------|--------------|------------|-----------|
| 1 <sup>st</sup> cycle            | 15.6 ± 1.2 | (7.8 ± 2.9) × 10 <sup>6</sup> | -3.5 ± 1.0   | -3.7 ± 0.9 | 2.0 ± 0.5 |
| 2 <sup>nd</sup> cycle            | 21.8 ± 3.4 | (1.7 ± 0.8) × 10 <sup>6</sup> | -6.0 ± 3.1   | -          | -         |
| 3 <sup>rd</sup> cycle            | 23.6 ± 3.7 | (7.4 ± 5.3) × 10 <sup>1</sup> | -22.5 ± 8.2  | -          | -         |
| 4 <sup>th</sup> cycle            | 25.3 ± 3.6 | 7.3 ± 2.6                     | -37.0 ± 9.5  | -          | -         |
| 5 <sup>th</sup> cycle            | 23.7 ± 3.9 | 5.5 ± 2.1                     | -55.1 ± 14.4 | -          | -         |
| 6 <sup>th</sup> cycle            | 17.7 ± 4.1 | 3.5 ± 2.3                     | -85.3 ± 19.3 | -          | -         |
| 7 <sup>th</sup> cycle            | 17.6 ± 3.5 | 3.6 ± 2.1                     | -77.1 ± 10.3 | -          | -         |
| 8 <sup>th</sup> cycle            | 17.5 ± 3.1 | 3.5 ± 2.3                     | -76.1 ± 10.7 | -          | -         |
| 9 <sup>th</sup> cycle            | 17.4 ± 3.0 | 3.6 ± 2.4                     | -75.5 ± 9.5  | -          | -         |
| 10 <sup>th</sup> cycle           | 17.4 ± 3.2 | 3.5 ± 2.3                     | -75.0 ± 9.4  | -          | -         |
| 11 <sup>th</sup> cycle           | 17.4 ± 3.1 | 3.6 ± 2.2                     | -74.9 ± 8.8  | -          | -         |
| 12 <sup>th</sup> cycle           | 17.3 ± 3.3 | 3.7 ± 2.1                     | -74.6 ± 9.1  | -          | -         |
| 13 <sup>th</sup> cycle           | 17.2 ± 3.1 | 3.7 ± 2.0                     | -74.4 ± 9.0  | -          | -         |
| 14 <sup>th</sup> cycle           | 17.2 ± 2.8 | 3.8 ± 2.0                     | -74.3 ± 8.7  | -          | -         |

<sup>a</sup> Gray area indicates device characteristics during proton irradiation.

**Table S5.** Representative charge-carrier mobility ( $\mu$ , cm<sup>2</sup>/Vs), current on/off ratio ( $I_{on}/I_{off}$ ), threshold voltage ( $V_{th}$ , V), turn-on voltage ( $V_{on}$ , V), and subthreshold swing ( $SS$ , V/dec) for ZITO TFTs with different  $t_{ch}$  values on SiO<sub>2</sub> 100 nm devices before and right after and 6 h after proton irradiation with a dose of 10<sup>13</sup> cm<sup>-2</sup>. The average values are obtained from 5 samples.

| ZITO / SiO <sub>2</sub><br>100nm    | Dose                        | $\mu$      | $I_{on}/I_{off}$                 | $V_{th}$     | $V_{on}$   | $SS$         |
|-------------------------------------|-----------------------------|------------|----------------------------------|--------------|------------|--------------|
|                                     | <b>Referenc<br/>e</b>       | 10.3 ± 1.1 | (1.3 ±<br>0.5) × 10 <sup>7</sup> | 0.2 ± 0.4    | 0 ± 0.3    | 1.1 ±<br>0.3 |
| <b><math>t_{ch} = 4</math> nm</b>   | <b>10<sup>13</sup> dose</b> | 14.3 ± 3.9 | (1.1 ±<br>0.5) × 10 <sup>4</sup> | -10.5 ± 2.0  | -          | 4.0 ±<br>1.6 |
|                                     | <b>After 6 h</b>            | 10.4 ± 0.9 | (4.0 ±<br>2.1) × 10 <sup>6</sup> | -0.7 ± 0.3   | -1 ± 0.6   | 1.5 ±<br>0.6 |
|                                     | <b>Referenc<br/>e</b>       | 13.2 ± 1.5 | (7.0 ±<br>3.2) × 10 <sup>6</sup> | -2.0 ± 0.8   | -3 ± 0.6   | 1.1 ±<br>0.5 |
| <b><math>t_{ch} = 5</math> nm</b>   | <b>10<sup>13</sup> dose</b> | 16.4 ± 4.5 | 4.9 ± 3.7                        | -58.0 ± 15.4 | -          | -            |
|                                     | <b>After 6 h</b>            | 16.0 ± 1.4 | (1.6 ±<br>0.7) × 10 <sup>4</sup> | -22.1 ± 6.3  | -          | -            |
|                                     | <b>Referenc<br/>e</b>       | 15.6 ± 1.2 | (7.8 ±<br>4.3) × 10 <sup>6</sup> | -3.5 ± 1.0   | -3.7 ± 0.9 | 2.0 ±<br>0.5 |
| <b><math>t_{ch} = 6.2</math> nm</b> | <b>10<sup>13</sup> dose</b> | 17.7 ± 4.1 | 3.5 ± 2.3                        | -85.3 ± 19.3 | -          | -            |
|                                     | <b>After 6 h</b>            | 17.0 ± 1.0 | (1.5 ±<br>0.7) × 10 <sup>1</sup> | -39.1 ± 7.5  | -          | -            |

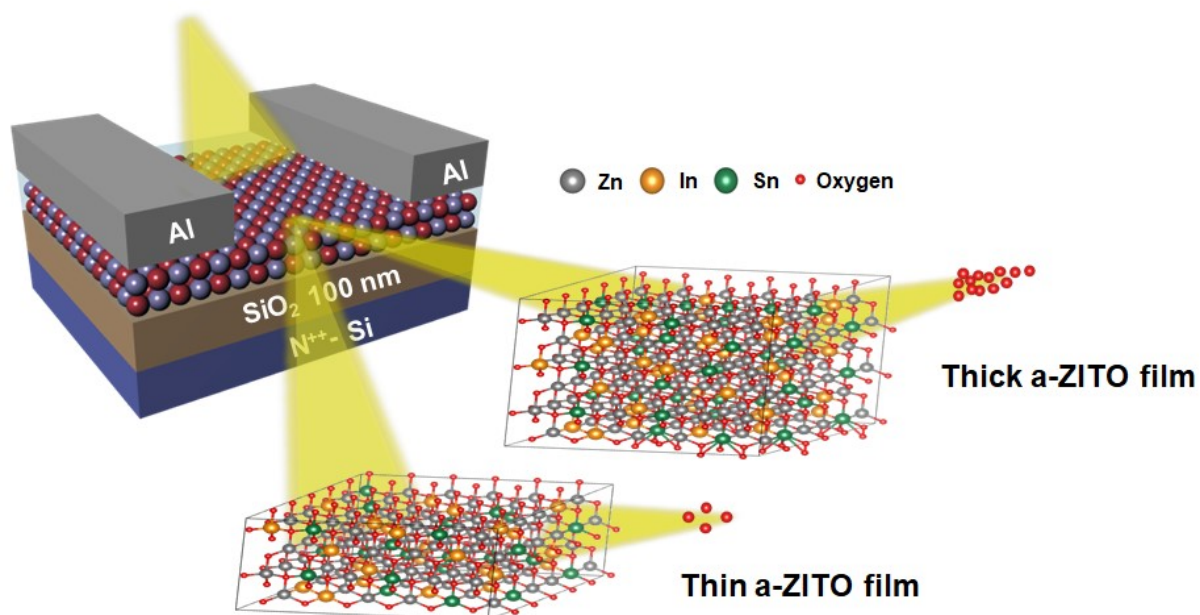

**Figure S1.** Schematic diagram of high-energy proton irradiation on bottom-gate/top-contact amorphous zinc-indium-tin oxide (a-ZITO) thin-film transistor device.

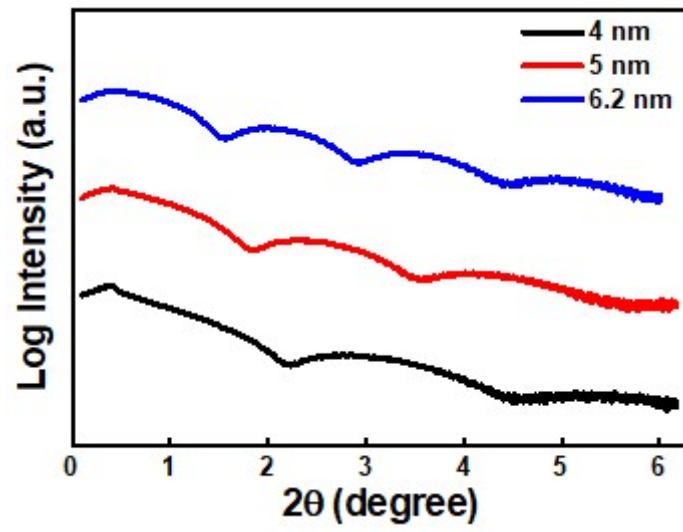

**Figure S2.** X-ray Reflectometry (XRR) of ZITO thin films with different  $t_{ch}$  values of 4 nm, 5 nm, and 6.2 nm.



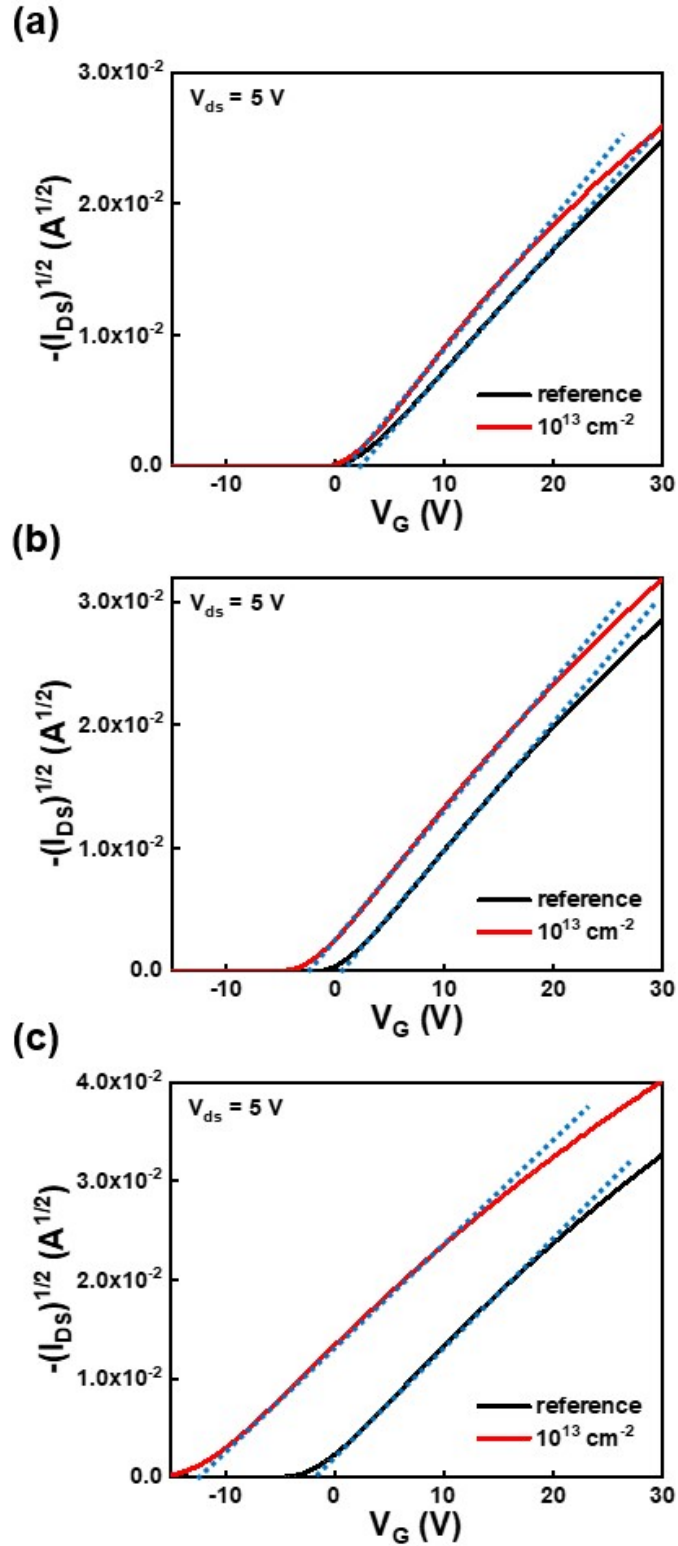

**Figure S3.**  $(I_{ds})^{1/2}$  vs  $V_G$  plots of pristine ZITO thin film transistors (a) with different  $t_{ch}$  values (4 nm, 5 nm, and 6.2 nm), (b)-(d) before (solid black lines) and 6 h after 5 MeV proton irradiation dose of  $10^{13} \text{ cm}^{-2}$  (solid red lines):  $t_{ch}$  value of (b) 4 nm, (c) 5 nm, and (d) 6.2 nm.

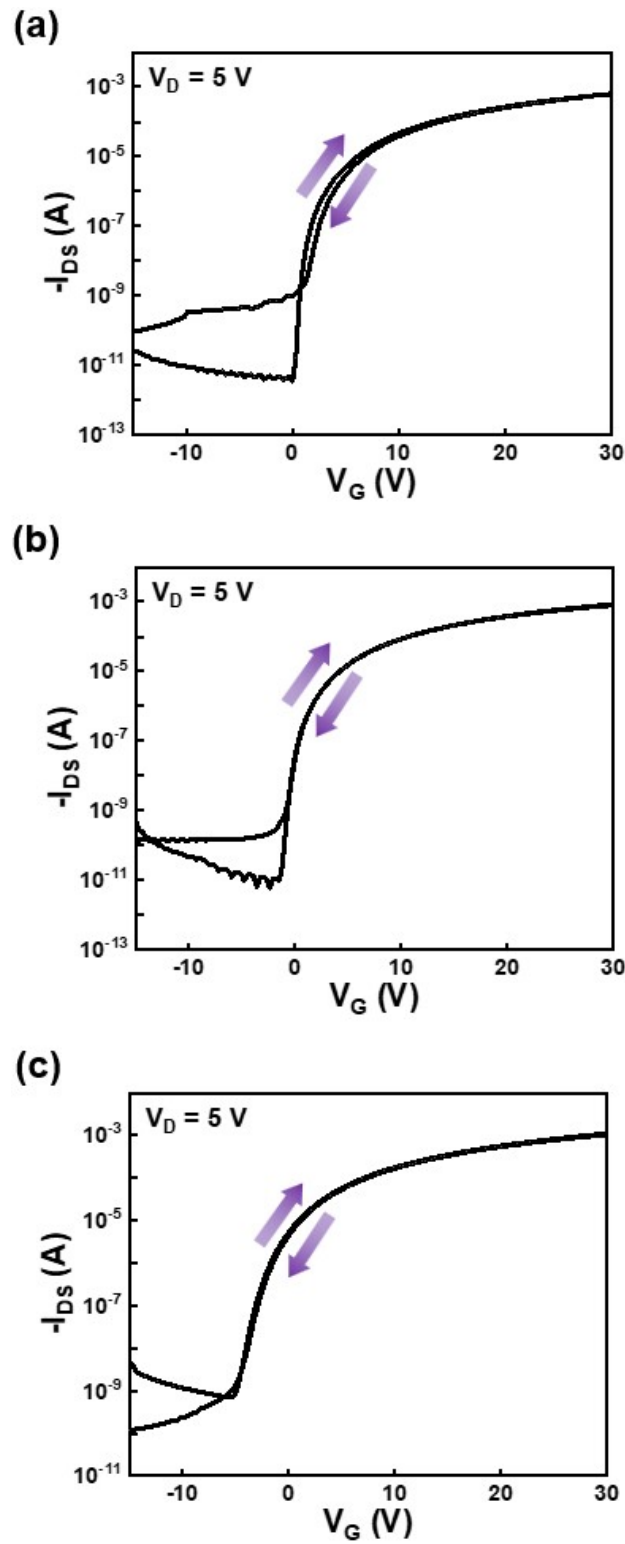

**Figure S4.** Transfer curves of the ZITO TFTs with different  $t_{\text{ch}}$  values measured bidirectionally before proton irradiation:  $t_{\text{ch}}$  value of (a) 4 nm, (b) 5 nm, and (c) 6.2 nm.

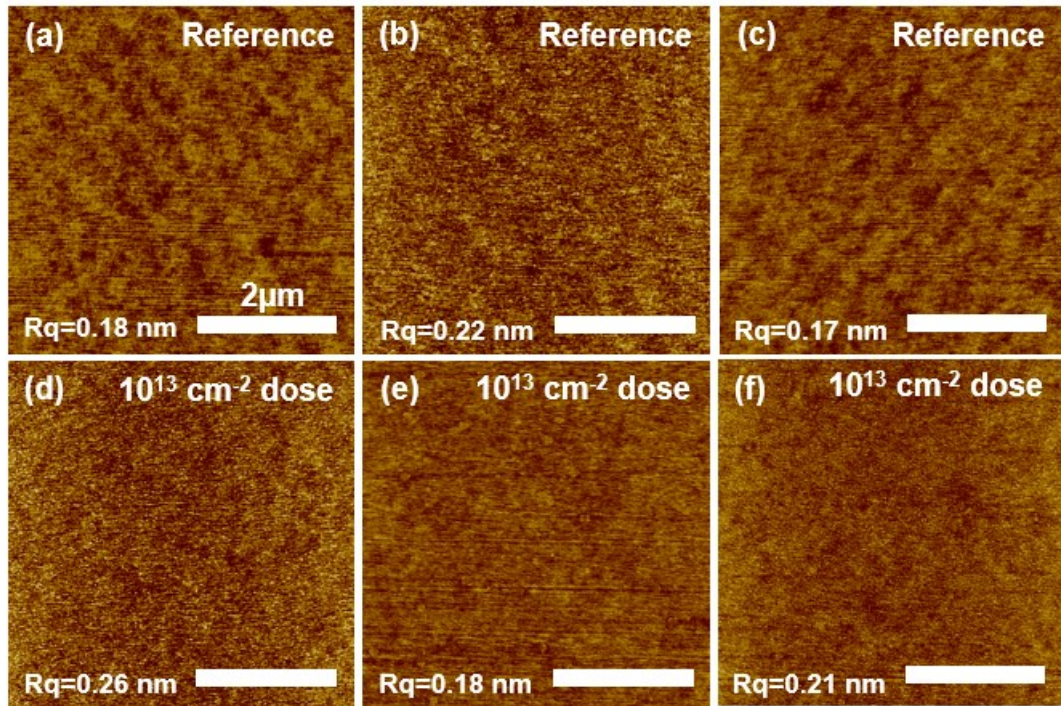

**Figure S5.** Atomic force microscope (AFM) images of ZITO thin films before and after 5 MeV proton irradiation ( $10^{13} \text{ cm}^{-2}$  dose): ZITO thin films with different  $t_{\text{chs}}$  of (a) 4 nm before proton irradiation, (b) 5 nm before proton irradiation, (c) 6.2 nm before proton irradiation, (d) 4 nm after proton irradiation, (e) 5 nm after proton irradiation, (f) 6.2 nm after proton irradiation. The scale bars correspond to 2  $\mu\text{m}$ .  $R_q$  is RMS (root-mean-square) roughness.

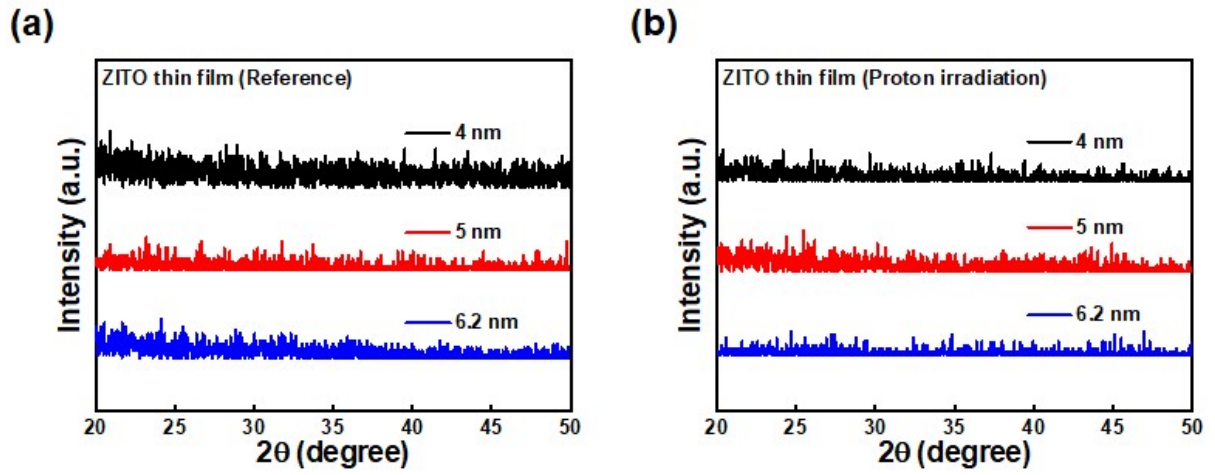

**Figure S6.** Grazing-incidence X-ray diffraction (GIXRD) spectra of ZITO thin films with different  $t_{ch}$  values before and after 5 MeV proton irradiation doses of  $10^{13}$  cm $^{-2}$ : ZITO thin film with  $t_{ch}$  values of 4, 5, and 6.2 nm (a) before and (b) after proton irradiation.

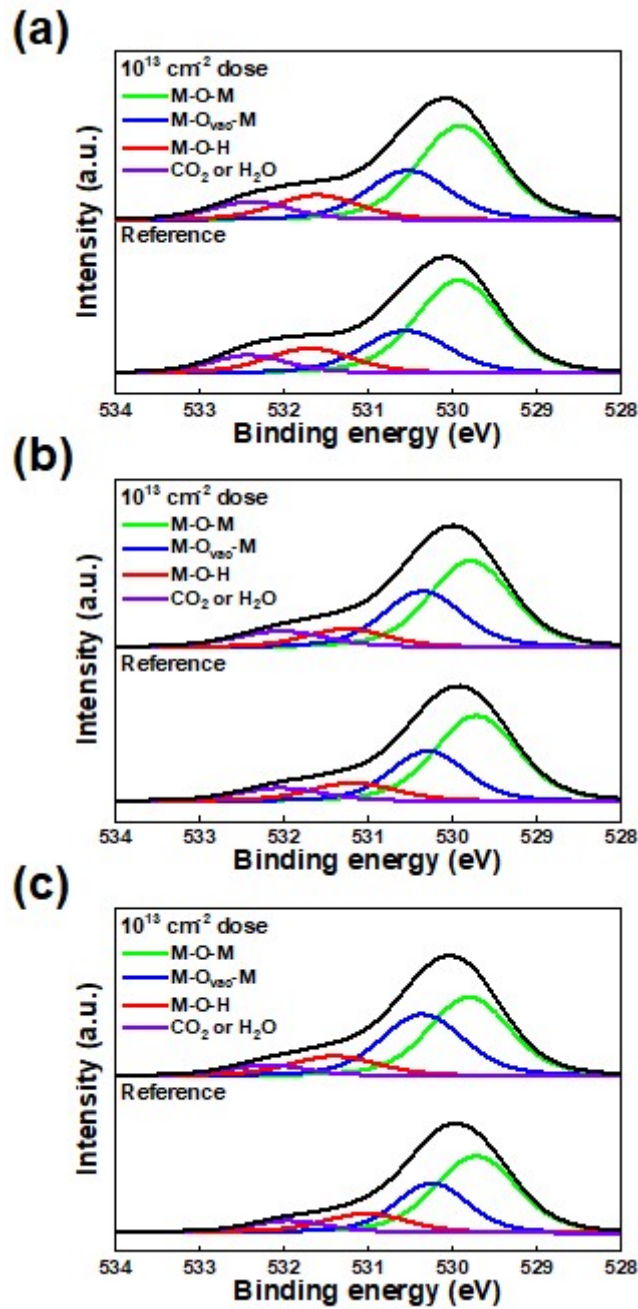

**Figure S7.** X-ray photoelectron spectroscopy (XPS) data of amorphous zinc-indium-tin oxide semiconductor thin film before and after 5 MeV proton irradiation (dose of  $10^{13} \text{ cm}^{-2}$ ). O1s spectra for ZITO thin film with  $t_{ch}$  values of a) 4 nm, b) 5 nm, and c) 6.2 nm.

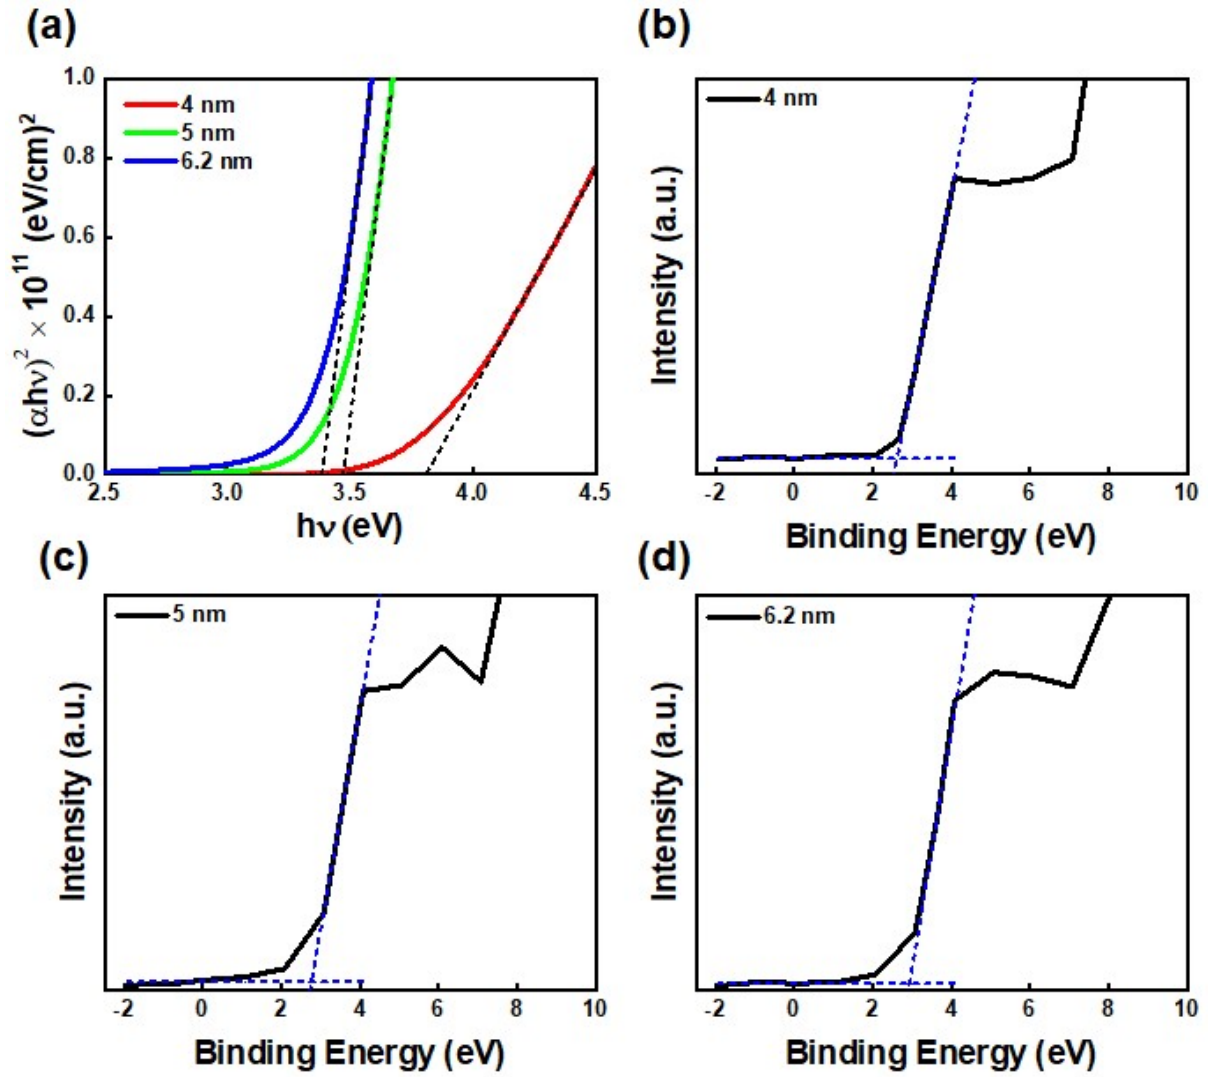

**Figure S8.** (a) Dependence of photon energy on  $(\alpha h\nu)^2$  for ZITO thin films with different  $t_{\text{ch}}$ s on glass substrate, XPS spectrum measured near the valence band for ZITO thin films with different  $t_{\text{ch}}$  of (b) 4 nm, (c) 5 nm, and (d) 6.2 nm.

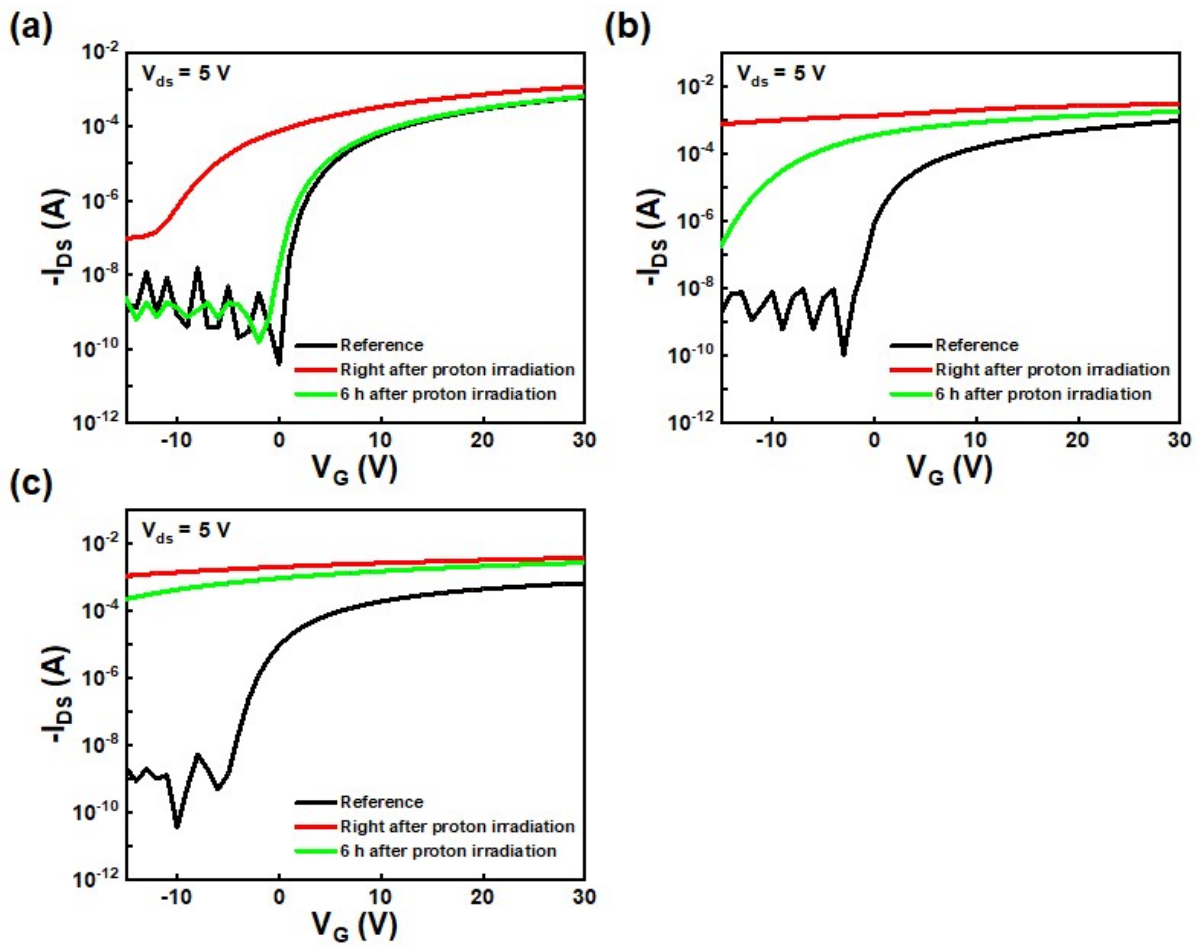

**Figure S9.** Transfer curve of ZITO thin film transistors with different  $t_{\text{ch}}$  in linear region at before proton (solid black lines), right after proton with electrical bias (solid red lines), 6 h after proton (solid green lines): ZITO TFT with  $t_{\text{ch}}$  values of (a) 4 nm, (b) 5 nm, and (c) 6.2 nm.
